# Supplementary material
Source: PubMed Central journal article supplement (PMC6600938)
Supplement: pnas.1900572116.sapp.pdf [file pnas.1900572116.sapp.pdf]

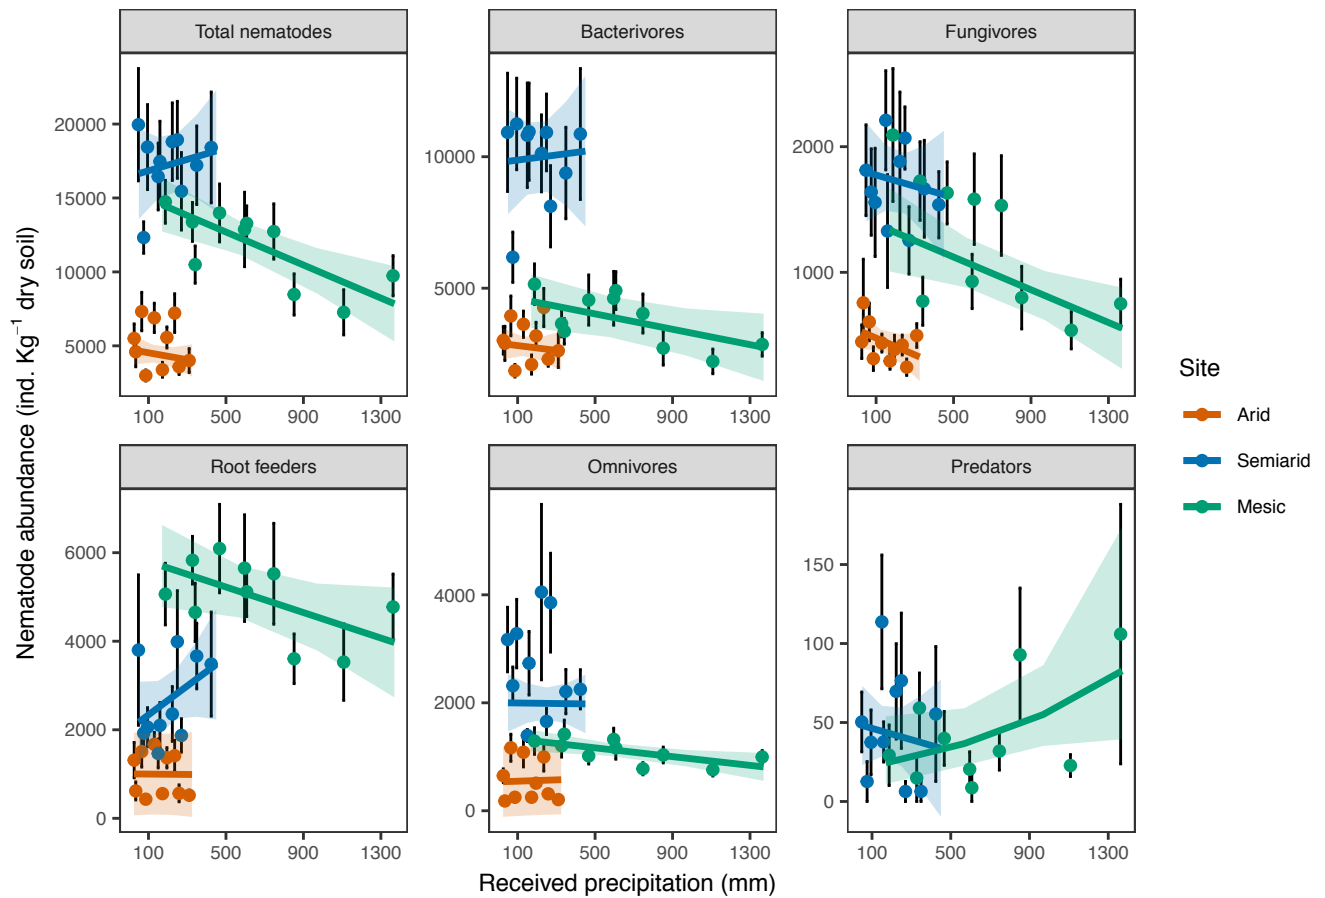

**Fig. S1** Response of nematode functional groups to changes in growing-season precipitation across three ecosystem types. Color-coded trend lines represent local effects of received growing-season precipitation ( $n = 80$ ) predicted by mixed effects models. Shaded regions indicate 95% confidence limits. Points represent mean abundance of nematodes per precipitation level ( $n = 8$ ), and error bars represent standard error of the mean. Total abundance of nematodes:  $P_{\text{Arid}} = 0.4189$ ,  $r^2_{\text{Arid}} = 0.36\%$ ,  $P_{\text{Semiarid}} = 0.6180$ ,  $r^2_{\text{Semiarid}} = 16.03\%$ ,  $P_{\text{Mesic}} = 0.0009$ ,  $r^2_{\text{Mesic}} = 95.1\%$ . Bacterivores:  $P_{\text{Arid}} = 0.6309$ ,  $r^2_{\text{Arid}} = 0.21\%$ ,  $P_{\text{Semiarid}} = 0.8538$ ,  $r^2_{\text{Semiarid}} = 24.94\%$ ,  $P_{\text{Mesic}} = 0.0422$ ,  $r^2_{\text{Mesic}} = 97.2\%$ . Fungivores:  $P_{\text{Arid}} = 0.1619$ ,  $r^2_{\text{Arid}} = 3.90\%$ ,  $P_{\text{Semiarid}} = 0.6447$ ,  $r^2_{\text{Semiarid}} = 0.19\%$ ,  $P_{\text{Mesic}} = 0.0077$ ,  $r^2_{\text{Mesic}} = 95.96\%$ . Root feeders  $P_{\text{Arid}} = 0.9384$ ,  $r^2_{\text{Arid}} = 9.87\%$ ,  $P_{\text{Semiarid}} = 0.1692$ ,  $r^2_{\text{Semiarid}} = 2.21\%$ ,  $P_{\text{Mesic}} = 0.0328$ ,  $r^2_{\text{Mesic}} = 95.48\%$ . Omnivores:  $P_{\text{Arid}} = 0.6915$ ,  $r^2_{\text{Arid}} = 9.87\%$ ,  $P_{\text{Semiarid}} = 0.9656$ ,

$r^2_{\text{Semi-arid}} = 8.41\%$ ,  $P_{\text{Mesic}} = 0.0183$ ,  $r^2_{\text{Mesic}} = 7.37\%$ . Predators:  $P_{\text{Semi-arid}} = 0.6362$ ,  $r^2_{\text{Semi-arid}} = 0.55\%$ ,  
 $P_{\text{Mesic}} = 0.0657$ ,  $r^2_{\text{Mesic}} = 93.78\%$ .
